# Supplementary material
Source: Springer Nature journal article supplement (https://www.springermedizin.de/resource/supplementary/12888_2011_930_MOESM1_ESM.pdf/9478556)

1. Does the quality improvement intervention give significant improvements to patient, organisational and professional related outcomes?

a) Does the intervention improve the content of referral letter?

b) Do improved referral letters have an impact on patient, organisational and professional related outcomes?

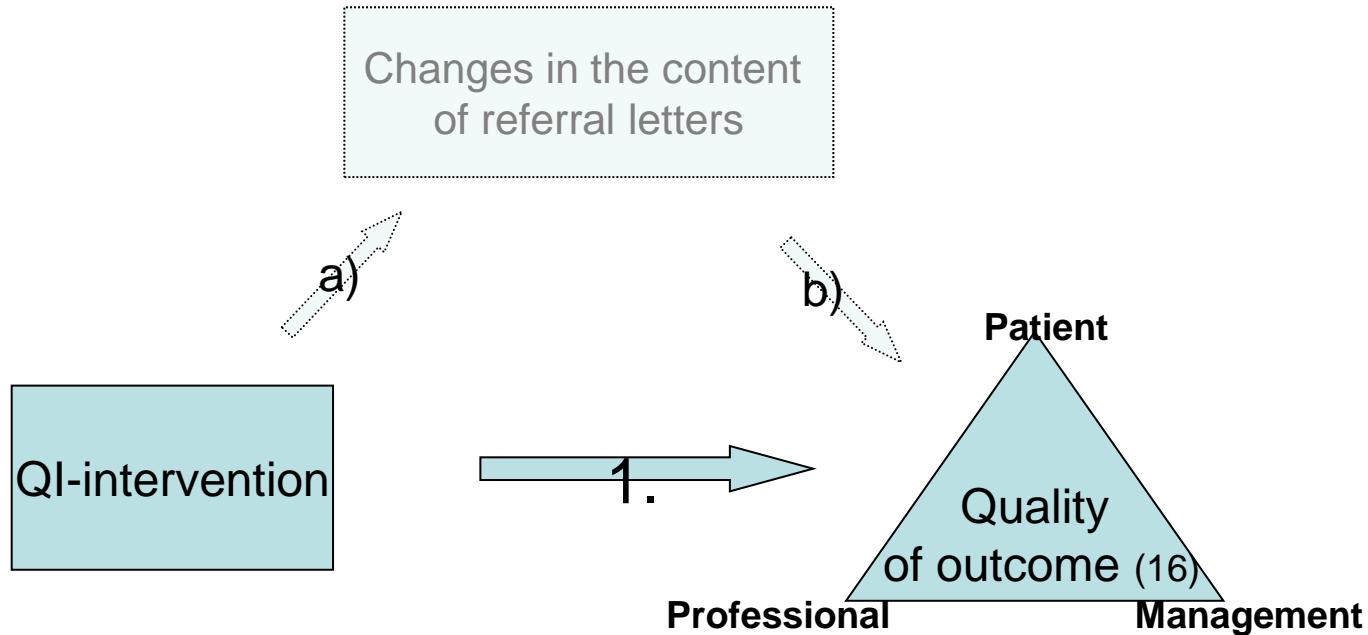

Supplement: MOESM1 [file 9478556]
